# Supplementary material
Source: PubMed Central journal article supplement (PMC6066448)
Supplement: NIHMS937448-supplement-Supplemental_Digital_Content.pdf [file NIHMS937448-supplement-Supplemental_Digital_Content.pdf]

## Supplemental Digital Appendix 1

### Comparison of the Original National Faculty Survey 1995 Cohort with 2012–13 Subset Who Agreed To Participate in Future Studies, From a Follow-Up Study of the Effects of Gender on Retention, Rank, and Leadership Positions in Academic Medicine, 2012–2013

| Characteristic                                | Value                | Men             |               | Women           |               |
|-----------------------------------------------|----------------------|-----------------|---------------|-----------------|---------------|
|                                               |                      | 1995            | 2012–13       | 1995            | 2012–13       |
| Total, n/N (%)                                |                      | 936/1,801 (52%) | 320/641 (50%) | 865/1,801 (48%) | 316/632 (50%) |
| Race/ethnicity, n/N (%)                       | Non Hispanic white   | 758/936 (81%)   | 500/641 (78%) | 701/865 (81%)   | 512/632 (82%) |
| Department, n/N (%)                           | Basic scientists     | 214/936 (23%)   | 154/641 (24%) | 216/865 (25%)   | 139/632 (22%) |
|                                               | Generalists          | 309/936 (33%)   | 160/641 (25%) | 259/865 (30%)   | 183/632 (29%) |
|                                               | Medical specialists  | 275/936 (24%)   | 199/641 (31%) | 242/865 (28%)   | 209/632 (33%) |
|                                               | Surgical specialists | 178/936 (19%)   | 128/641 (20%) | 134/865 (16%)   | 101/632 (16%) |
| Mean (SD) number of refereed articles in 1995 |                      | 36 (49)         | 33 (38)       | 23 (33)         | 22 (32)       |

SD indicates standard deviation.
